# Supplementary material for: Brain Activation of Elite Race Walkers in Action Observation, Motor Imagery, and Motor Execution Tasks: A Pilot Study
Source: Front Hum Neurosci. 2019 Mar 1;13:80. doi: 10.3389/fnhum.2019.00080 (PMC6405507; doi:10.3389/fnhum.2019.00080)
Supplement: Supplementary file 2 [file Table_2.XLSX]

## Sheet: result
	motortask					time					motortask:time					group					group:motortask					group:time					group:motortask:time
channel	F	P(permutation)	FDR		channel	F	P(permutation)	FDR		channel	F	P(permutation)	FDR		channel	F	P(permutation)	FDR		channel	F	P(permutation)	FDR		channel	F	P(permutation)	FDR		channel	F	P(permutation)	FDR
1	4.66	0.0084	0.0189		1	6.439	0.0094	0.052875		1	6.037	0.0072	0.054		1	10.878	0.011	0.055		1	7.082	0.0108	0.0211304		1	2.082	0.1654	7.443		1	0.143	0.9412	1.46048
2	4.631	0.02494	0.0387		2	3.064	0.06033	0.193918		2	2.838	0.09786	0.44037		2	9.749	0.0022	0.0165		2	8.836	0.0046	0.0138		2	1.031	0.2786	4.179		2	0.05	0.9608	1.31018
3	5.656	0.0044	0.0132		3	0.594	0.09859	0.233503		3	1.283	0.3415	0.808816		3	1.801	0.1755	0.239318		3	6.514	0.0106	0.0216818		3	0.331	0.6029	2.26087		3	0.015	0.9804	1.2255
4	4.673	0.0094	0.0201429		4	1.922	0.0054	0.06075		4	1.965	0.1549	0.497893		4	0.612	0.2704	0.328865		4	5.52	0.019	0.0285		4	0.016	0.9216	1.33781		4	0.101	0.9608	1.27165
5	4.991	0.0168	0.03024		5	3.521	0.07428	0.1857		5	2.033	0.18868	0.56604		5	5.374	0.02741	0.0770906		5	10.531	0.0022	0.00825		5	0	0.96078	1.31015		5	0.433	0.79121	1.97802
6	11.286	0.0008	0.00514286		6	15.803	0.02981	0.111787		6	8.171	0	0		6	14.841	0.0014	0.0315		6	7.886	0.0132	0.02376		6	0.744	0.486	3.645		6	0.058	1	1.125
7	12.42	0	0		7	25.354	0.0014	0.0315		7	12.179	0	0		7	3.083	0.06657	0.130246		7	8.09	0.0072	0.0190588		7	0.284	0.58108	2.61486		7	0.397	0.63934	3.1967
8	4.239	0.0174	0.0301154		8	3.657	0.0062	0.0558		8	2.386	0.1078	0.40425		8	15.225	0.0014	0.021		8	1.769	0.2	0.2		8	0.343	0.7647	1.81113		8	0.097	0.7368	2.07225
9	4.693	0.0256	0.0371613		9	0.427	0.7255	0.859145		9	0.365	0.843	0.972692		9	0.188	0.5733	0.644962		9	8.411	0.0074	0.0185		9	0.199	0.6333	1.8999		9	0.077	0.9545	1.38556
10	4.377	0.0058	0.0153529		10	0.514	1	1.09756		10	0.441	0.7056	0.933882		10	3.411	0.18182	0.240644		10	3.471	0.07731	0.0915513		10	0	1	1.15385		10	0.16	0.70652	2.44565
11	6.736	0.001	0.0045		11	0.208	0.4155	0.584297		11	1.648	0.37917	0.812507		11	4.123	0.04554	0.11385		11	5.86	0.0178	0.0286071		11	0.13	0.84314	1.7246		11	0.116	0.94118	1.51261
12	4.288	0.02234	0.0372333		12	10.609	0.0086	0.0645		12	5.278	0.0086	0.0552857		12	2.896	0.05005	0.118539		12	8.908	0.0012	0.00771429		12	0.747	0.46957	4.22613		12	0.168	0.85915	1.75735
13	23.244	0	0		13	37.085	0.0086	0.0552857		13	19.866	0	0		13	18.765	0.0016	0.018		13	17.981	0.0014	0.007875		13	0.074	0.8627	1.68789		13	1.028	0.359	4.03875
14	6.861	0.0012	0.00490909		14	1.588	0.1766	0.31788		14	0.984	0.3029	0.801794		14	0.584	0.39869	0.460027		14	5.03	0.02273	0.0309955		14	1.064	0.24281	5.46322		14	0.09	1	1.09756
15	3.049	0.123	0.135		15	0.308	0.2915	0.452328		15	0.732	0.4453	0.80154		15	1.089	0.1401	0.217397		15	2.107	0.1516	0.162429		15	0.012	0.8824	1.58832		15	0.107	0.7727	2.04538
16	9.066	0	0		16	0.534	0.5412	0.695829		16	1.686	0.2278	0.640687		16	1.285	0.2436	0.3045		16	2.125	0.1129	0.127013		16	0	1	1.125		16	0.108	0.9804	1.19238
17	5.633	0.0062	0.0155		17	1.34	0.09913	0.223042		17	1.604	0.435	0.851087		17	2.082	0.1087	0.188135		17	5.33	0.0184	0.0285517		17	0.001	1	1.09756		17	0.002	1	1.07143
18	4.07	0.0238	0.03825		18	1.182	0.146	0.285652		18	2.841	0.1012	0.414		18	3.422	0.0518	0.11655		18	6.944	0.0086	0.01935		18	0.042	0.8824	1.52723		18	0.109	0.9608	1.23531
19	7.043	0.0002	0.0018		19	25.701	0.0012	0.054		19	5.156	0.0104	0.0585		19	4.337	0.03201	0.0847324		19	8.264	0.0048	0.0135		19	0.115	0.5942	2.43082		19	0.629	0.5508	3.54086
20	9.571	0.0006	0.0045		20	19.359	0.0016	0.024		20	6.547	0.0052	0.0468		20	10.2	0.0018	0.0162		20	8.082	0.0082	0.0194211		20	0.204	0.5476	2.738		20	0.433	0.902	1.50333
21	5.219	0.004	0.0138462		21	0.522	0.06891	0.193809		21	0.055	1	1.07143		21	0.135	0.8039	0.841291		21	7.611	0.0092	0.0197143		21	0.156	0.6029	2.08696		21	0.136	0.8485	1.81821
22	0.917	0.64057	0.655128		22	1.088	0.06136	0.18408		22	2.586	0.0781	0.3905		22	5.174	0.1279	0.213167		22	1.863	0.1906	0.194932		22	0.064	0.7059	1.76475		22	0.014	1	1.04651
23	5.846	0.008	0.0189474		23	1.202	0.1881	0.325558		23	1.367	0.4648	0.774667		23	2.337	0.08542	0.160162		23	6.516	0.0114	0.021375		23	0.013	0.96078	1.27162		23	0.009	1	1.02273
24	4.504	0.004	0.0128571		24	0.695	0.201	0.335		24	1.909	0.1135	0.392885		24	2.183	0.12999	0.208913		24	3.168	0.08061	0.0930115		24	0.19	0.54118	3.04414		24	0.019	0.96078	1.3511
25	4.265	0.02521	0.037815		25	0.931	0.04185	0.144865		25	1	0.81818	0.968897		25	6.452	0.0048	0.027		25	20.865	0	0		25	0.104	0.90196	1.44958		25	3.638	0.04301	1.93545
26	10.692	0	0		26	15.613	0.0098	0.049		26	8.149	0.0002	0.00225		26	8.617	0.0042	0.027		26	10.261	0.0018	0.00736364		26	0	0.9804	1.26051		26	0.444	0.5786	3.25462
27	4.969	0.015	0.0306818		27	0.442	0.1509	0.282938		27	0.628	0.6053	0.851203		27	0.398	0.3772	0.446684		27	5.901	0.017	0.0283333		27	0.002	1	1.07143		27	0.018	0.9412	1.4118
28	2.715	0.1034	0.116325		28	0.156	0.8824	0.9927		28	0.165	0.7253	0.932529		28	1.354	0.169	0.237656		28	2.326	0.1738	0.181884		28	0.022	0.9804	1.2255		28	0.032	0.9804	1.161
29	4.84	0.077	0.0911842		29	0.076	0.6029	0.733257		29	0.83	0.4891	0.786054		29	6.451	0.0116	0.0474545		29	9.204	0.0004	0.0045		29	0.001	1	1.04651		29	0.016	0.9804	1.13123
30	4.314	0.04296	0.0585818		30	0.289	0.4583	0.624955		30	0.396	0.3966	0.811227		30	3.987	0.08779	0.158022		30	7.785	0.0032	0.0110769		30	0.054	0.90196	1.39959		30	0.106	0.86275	1.68799
31	3.057	0.07887	0.0910038		31	0.618	0.3021	0.45315		31	0.59	0.5657	0.821177		31	6.229	0.05786	0.123986		31	2.424	0.13005	0.142738		31	0.144	0.88235	1.65441		31	0.132	0.87879	1.64773
32	8.716	0.0014	0.00525		32	0.294	0.36994	0.53701		32	0.134	0.7718	0.938676		32	3.946	0.06615	0.135307		32	6.463	0.0134	0.0231923		32	0.003	0.92157	1.38236		32	0.443	0.68362	2.79663
33	4.121	0.0156	0.0305217		33	2.076	0.07375	0.195221		33	1.062	0.5431	0.842741		33	10.27	0.017	0.0588462		33	5.219	0.02232	0.0313875		33	0.003	1	1.02273		33	0.238	0.67376	3.03192
34	5.133	0.06238	0.077975		34	0.025	0.8039	0.927577		34	0.644	0.5514	0.8271		34	0.178	0.86275	0.86275		34	4.511	0.03845	0.0494357		34	0.223	0.68627	1.8166		34	0.036	1	1
35	3.664	0.0474	0.0627353		35	0.536	0.1408	0.301714		35	0.978	0.3588	0.8073		35	1.821	0.15858	0.23787		35	3.891	0.05113	0.0621851		35	0.436	0.62295	2.00234		35	0.919	0.53986	4.04895
36	5.609	0.05323	0.0684386		36	0.271	0.2164	0.347786		36	0.907	0.4512	0.780923		36	4.931	0.0152	0.057		36	14.054	0.0008	0.0072		36	0.01	0.9216	1.296		36	0.294	0.729	2.34321
37	0.147	0.8143	0.8143		37	0.206	1	1.07143		37	0.387	0.9181	1.03286		37	4.013	0.2046	0.263057		37	6.355	0.01991	0.0289016		37	0.755	0.42647	4.79779		37	0.268	0.83333	1.87499
38	7.305	0.0008	0.0045		38	0.014	1	1.04651		38	0.192	0.6933	0.945409		38	19.792	0.0004	0.018		38	33.83	0	0		38	0.023	0.7647	1.72058		38	1.067	0.2781	6.25725
39	6.109	0.0052	0.014625		39	0.076	0.50505	0.668449		39	0.59	1	1.04651		39	11.996	0.011	0.0495		39	9.43	0.0042	0.0135		39	0.002	0.9804	1.19238		39	0.234	0.8941	1.54748
40	3.616	0.042	0.0590625		40	0.001	1	1.02273		40	0.144	0.931	1.02183		40	0.034	0.68627	0.753223		40	3.629	0.04545	0.0568125		40	0.241	0.65455	1.84092		40	0.176	0.80556	1.90791
41	4.744	0.06333	0.077023		41	1.028	0.1412	0.288818		41	1.162	0.311	0.7775		41	0.1	0.7451	0.798321		41	10.535	0.0014	0.007		41	0.001	0.9804	1.161		41	0.187	0.6857	2.57138
42	1.331	0.371	0.3975		42	2.485	0.0128	0.0576		42	1.413	0.44482	0.834037		42	0.058	0.82353	0.842247		42	5.075	0.02886	0.0381971		42	0.429	0.49057	3.15366		42	0.157	0.88235	1.58823
43	1.999	0.6154	0.644023		43	1.827	0.02251	0.0920864		43	0.813	0.73554	0.919425		43	4.133	0.0231	0.0693		43	17.016	0	0		43	0.003	0.8824	1.47067		43	0.241	0.734	2.202
44	5.479	0.0162	0.030375		44	0.017	0.5733	0.716625		44	0.12	1	1.02273		44	4.913	0.0196	0.063		44	12.857	0.001	0.0075		44	0.042	0.8431	1.80664		44	1.163	0.3133	4.6995
45	7.104	0.0008	0.004		45	0.539	1	1		45	0.001	1	1		45	2.508	0.168	0.243871		45	14.646	0.0014	0.0063		45	0	1	1		45	0.957	0.5271	4.7439

## Sheet: location information
1	-43	46	29	Frontal_Mid_L	0.97872	L	46	L:Dorsolateral prefrontal cortex	0.50213
2	-26	46	43	Frontal_Sup_L	0.7	L	9	L:Dorsolateral prefrontal cortex	0.92727
3	-9	48	51	Frontal_Sup_Medial_L	0.61475	L	9	L:Dorsolateral prefrontal cortex	0.86475
4	13	48	51	Frontal_Sup_R	0.50413	R	9	R:Dorsolateral prefrontal cortex	0.85124
5	32	45	44	Frontal_Mid_R	0.72685	R	9	R:Dorsolateral prefrontal cortex	0.93981
6	48	43	28	Frontal_Mid_R	0.88285	R	45	R:pars triangularis Broca's area	0.76987
7	-51	34	27	Frontal_Inf_Tri_L	0.67636	L	45	L:pars triangularis Broca's area	0.98909
8	-39	34	46	Frontal_Mid_L	1	L	9	L:Dorsolateral prefrontal cortex	0.83333
9	-17	36	57	Frontal_Sup_L	0.76078	L	8	L:Includes Frontal eye fields	0.73333
10	5	37	57	Frontal_Sup_Medial_R	0.63273	R	8	R:Includes Frontal eye fields	0.94182
11	23	36	57	Frontal_Sup_R	0.90079	R	8	R:Includes Frontal eye fields	0.72222
12	42	32	46	Frontal_Mid_R	1	R	9	R:Dorsolateral prefrontal cortex	0.84091
13	55	31	28	Frontal_Inf_Tri_R	0.66667	R	45	R:pars triangularis Broca's area	0.87814
14	-47	24	46	Frontal_Mid_L	1	L	9	L:Dorsolateral prefrontal cortex	0.59917
15	-32	23	59	Frontal_Mid_L	1	L	8	L:Includes Frontal eye fields	0.67717
16	-12	26	65	Frontal_Sup_L	0.49819	L	8	L:Includes Frontal eye fields	0.85921
17	14	26	65	Supp_Motor_Area_R	0.42807	R	8	R:Includes Frontal eye fields	0.84912
18	34	23	59	Frontal_Mid_R	0.66797	R	8	R:Includes Frontal eye fields	0.66016
19	49	21	47	Frontal_Mid_R	0.92157	R	9	R:Dorsolateral prefrontal cortex	0.70588
20	-56	9	41	Precentral_L	0.84815	L	6	L:Pre-Motor and Supplementary Motor Cortex	0.65185
21	-42	13	59	Frontal_Mid_L	0.8996	L	6	L:Pre-Motor and Supplementary Motor Cortex	0.46586
22	-21	14	69	Frontal_Sup_L	0.77509	L	6	L:Pre-Motor and Supplementary Motor Cortex	0.61938
23	2	12	69	Supp_Motor_Area_R	0.55593	R	6	R:Pre-Motor and Supplementary Motor Cortex	0.97627
24	23	12	70	Frontal_Sup_R	0.90141	R	6	R:Pre-Motor and Supplementary Motor Cortex	0.69366
25	44	11	59	Frontal_Mid_R	1	R	6	R:Pre-Motor and Supplementary Motor Cortex	0.46559
26	60	4	42	Precentral_R	0.81853	R	6	R:Pre-Motor and Supplementary Motor Cortex	0.80309
27	-51	-2	55	Precentral_L	0.67729	L	6	L:Pre-Motor and Supplementary Motor Cortex	0.93227
28	-32	0	67	Frontal_Sup_L	0.4484	L	6	L:Pre-Motor and Supplementary Motor Cortex	0.98932
29	-13	-1	75	Frontal_Sup_L	0.54785	L	6	L:Pre-Motor and Supplementary Motor Cortex	1
30	15	0	75	Frontal_Sup_R	0.60645	R	6	R:Pre-Motor and Supplementary Motor Cortex	1
31	34	-3	67	Frontal_Sup_R	0.66308	R	6	R:Pre-Motor and Supplementary Motor Cortex	1
32	54	-6	56	Precentral_R	0.47303	R	6	R:Pre-Motor and Supplementary Motor Cortex	0.6473
33	-61	-19	48	Postcentral_L	0.43478	L	1、2、3	L:Primary Somatosensory Cortex	0.82941
34	-44	-18	66	Precentral_L	0.60392	L	4	L:Primary Motor Cortex	0.64314
35	-23	-16	76	Precentral_L	0.71987	L	6	L:Pre-Motor and Supplementary Motor Cortex	0.85668
36	0	-16	74	Paracentral_Lobule_L	0.39576	L	6	L:Pre-Motor and Supplementary Motor Cortex	0.70671
37	24	-16	76	Precentral_R	0.76623	R	6	R:Pre-Motor and Supplementary Motor Cortex	0.90909
38	46	-18	66	Precentral_R	0.69498	R	4	R:Primary Motor Cortex	0.64479
39	64	-23	49	SupraMarginal_R	0.66791	R	1、2、3	R:Primary Somatosensory Cortex	0.82463
40	-53	-30	59	Postcentral_L	0.73622	L	1、2、3	L:Primary Somatosensory Cortex	0.84646
41	-35	-29	72	Postcentral_L	0.70333	L	4	L:Primary Motor Cortex	0.68333
42	-13	-32	80	Paracentral_Lobule_L	0.60645	L	4	L:Primary Motor Cortex	0.85161
43	14	-32	80	Postcentral_R	0.54375	R	4	R:Primary Motor Cortex	0.84375
44	35	-30	73	Postcentral_R	0.6041	R	4	R:Primary Motor Cortex	0.70648
45	55	-32	58	Parietal_Inf_R	0.41418	R	1、2、3	R:Primary Somatosensory Cortex	0.67537

## Sheet: summary
channel	MNI			L/R	BA	overlapped	F	p(permutation test - FDR)
	X	Y	Z
the main effect: motortask
1	-43	46	29	L	46	0.50213	4.66	0.0189
2	-26	46	43	L	9	0.92727	4.631	0.0387
3	-9	48	51	L	9	0.86475	5.656	0.0132
4	13	48	51	R	9	0.85124	4.673	0.0201429
5	32	45	44	R	9	0.93981	4.991	0.03024
6	48	43	28	R	45	0.76987	11.286	0.00514286
7	-51	34	27	L	45	0.98909	12.42	0
8	-39	34	46	L	9	0.83333	4.239	0.0301154
9	-17	36	57	L	8	0.73333	4.693	0.0371613
10	5	37	57	R	8	0.94182	4.377	0.0153529
11	23	36	57	R	8	0.72222	6.736	0.0045
12	42	32	46	R	9	0.84091	4.288	0.0372333
13	55	31	28	R	45	0.87814	23.244	0
14	-47	24	46	L	9	0.59917	6.861	0.00490909
16	-12	26	65	L	8	0.85921	9.066	0
17	14	26	65	R	8	0.84912	5.633	0.0155
18	34	23	59	R	8	0.66016	4.07	0.03825
19	49	21	47	R	9	0.70588	7.043	0.0018
20	-56	9	41	L	6	0.65185	9.571	0.0045
21	-42	13	59	L	6	0.46586	5.219	0.0138462
23	2	12	69	R	6	0.97627	5.846	0.0189474
24	23	12	70	R	6	0.69366	4.504	0.0128571
25	44	11	59	R	6	0.46559	4.265	0.037815
26	60	4	42	R	6	0.80309	10.692	0
27	-51	-2	55	L	6	0.93227	4.969	0.0306818
32	54	-6	56	R	6	0.6473	8.716	0.00525
33	-61	-19	48	L	1、2、3	0.82941	4.121	0.0305217
38	46	-18	66	R	4	0.64479	7.305	0.0045
39	64	-23	49	R	1、2、3	0.82463	6.109	0.014625
44	35	-30	73	R	4	0.70648	5.479	0.030375
45	55	-32	58	R	1、2、3	0.67537	7.104	0.004
the main effect: time
7	-51	34	27	L	45	0.98909	25.354	0.0315
20	-56	9	41	L	6	0.65185	19.359	0.024
the interaction effect: motortask×time
6	48	43	28	R	45	0.76987	8.171	0
7	-51	34	27	L	45	0.98909	12.179	0
13	55	31	28	R	45	0.87814	19.866	0
20	-56	9	41	L	6	0.65185	6.547	0.0468
26	60	4	42	R	6	0.80309	8.149	0.00225
the main effect: group
1	-43	46	29	L	46	0.50213	10.878	0.055
2	-26	46	43	L	9	0.92727	9.749	0.0165
6	48	43	28	R	45	0.76987	14.841	0.0315
8	-39	34	46	L	9	0.83333	15.225	0.021
13	55	31	28	R	45	0.87814	18.765	0.018
20	-56	9	41	L	6	0.65185	10.2	0.0162
25	44	11	59	R	6	0.46559	6.452	0.027
26	60	4	42	R	6	0.80309	8.617	0.027
29	-13	-1	75	L	6	1	6.451	0.0474545
38	46	-18	66	R	4	0.64479	19.792	0.018
39	64	-23	49	R	1、2、3	0.82463	11.996	0.0495
the interaction effect: motortask×group
1	-43	46	29	L	46	0.50213	7.082	0.0211304
2	-26	46	43	L	9	0.92727	8.836	0.0138
3	-9	48	51	L	9	0.86475	6.514	0.0216818
4	13	48	51	R	9	0.85124	5.52	0.0285
5	32	45	44	R	9	0.93981	10.531	0.00825
6	48	43	28	R	45	0.76987	7.886	0.02376
7	-51	34	27	L	45	0.98909	8.09	0.0190588
9	-17	36	57	L	8	0.73333	8.411	0.0185
11	23	36	57	R	8	0.72222	5.86	0.0286071
12	42	32	46	R	9	0.84091	8.908	0.00771429
13	55	31	28	R	45	0.87814	17.981	0.007875
14	-47	24	46	L	9	0.59917	5.03	0.0309955
17	14	26	65	R	8	0.84912	5.33	0.0285517
18	34	23	59	R	8	0.66016	6.944	0.01935
19	49	21	47	R	9	0.70588	8.264	0.0135
20	-56	9	41	L	6	0.65185	8.082	0.0194211
21	-42	13	59	L	6	0.46586	7.611	0.0197143
23	2	12	69	R	6	0.97627	6.516	0.021375
25	44	11	59	R	6	0.46559	20.865	0
26	60	4	42	R	6	0.80309	10.261	0.00736364
27	-51	-2	55	L	6	0.93227	5.901	0.0283333
29	-13	-1	75	L	6	1	9.204	0.0045
30	15	0	75	R	6	1	7.785	0.0110769
32	54	-6	56	R	6	0.6473	6.463	0.0231923
33	-61	-19	48	L	1、2、3	0.82941	5.219	0.0313875
34	-44	-18	66	L	4	0.64314	4.511	0.0494357
36	0	-16	74	L	6	0.70671	14.054	0.0072
37	24	-16	76	R	6	0.90909	6.355	0.0289016
38	46	-18	66	R	4	0.64479	33.83	0
39	64	-23	49	R	1、2、3	0.82463	9.43	0.0135
41	-35	-29	72	L	4	0.68333	10.535	0.007
42	-13	-32	80	L	4	0.85161	5.075	0.0381971
43	14	-32	80	R	4	0.84375	17.016	0
44	35	-30	73	R	4	0.70648	12.857	0.0075
45	55	-32	58	R	1、2、3	0.67537	14.646	0.0063

## Sheet: interaction effect
motortask×time
channel	expdata1=motor execution		expdata3=motor imagery		expdata2=motor observation
	z	p	z	p	z	p
6	3.4286	0.0002393	1.2571	0.2182	0.37143	0.7257
7	3.6	9.084e-05	1.0857	0.2897	0.8	0.4389
13	4.2	5.96e-07	2.6857	0.005898	1.6286	0.1074
20	3.1429	0.0009626	1.2571	0.2182	1.1714	0.2522
26	3.5714	0.0001076	2.2286	0.02486	0.4	0.7048
motortask×group
channel	expdata1=motor execution		expdata3=motor imagery		expdata2=motor observation
	z	p	z	p	z	p
1	-1.1573	0.2487	2.5173	0.011	-2.9479	0.0025
2	-1.9297	0.0495	3.1428	0.0009001	-3.844	0.0001
3	-2.2405	0.0249	3.446	0.0001	-2.484	0.0137
4	-2.1839	0.0258	2.2872	0.0202	-2.7946	0.005101
5	-2.1353	0.0308	2.3989	0.0154	-2.68	0.005901
6	-2.2927	0.0196	-0.54305	0.592	-3.3617	0.0006001
7	-1.9177	0.06041	0.75504	0.4511	-1.8309	0.06421
9	-2.5547	0.009301	3.8258	0.0001	-2.1168	0.0337
11	-1.4163	0.1486	3.1755	0.0015	-2.3606	0.0174
12	-1.5594	0.1182	2.7796	0.005101	-1.3061	0.1976
13	-2.3519	0.0143	0.64529	0.531	-2.148	0.0305
14	-0.50411	0.6182	1.5761	0.1134	-2.5195	0.01
17	-2.5816	0.009801	2.3025	0.0203	-2.7749	0.005001
18	-0.45206	0.6546	2.3892	0.0144	-1.1681	0.2454
19	-1.4377	0.1518	0.63895	0.5246	-2.7495	0.005601
20	-2.3147	0.0186	-0.49683	0.6209	-2.1947	0.0333
21	-0.24506	0.824	3.2847	0.0016	0.5914	0.5538
23	-3.7634	< 2.2e-16	1.3502	0.183	-3.2716	0.0009001
25	-0.73611	0.4638	1.2166	0.2299	-0.42232	0.6704
26	-3.3321	0.0006001	0.36994	0.7133	-2.6179	0.007501
27	-0.82239	0.4255	2.7372	0.009801	0.070215	0.9418
29	-4.7035	< 2.2e-16	2.5798	0.01	-4.3907	< 2.2e-16
30	-3.249	0.0009001	2.341	0.0208	-2.6494	0.006701
32	-2.628	0.007601	-0.5624	0.5547	-3.3877	0.0014
33	-1.246	0.2087	-1.3146	0.176	-2.0189	0.0439
34	-0.49692	0.6302	2.1573	0.0312	0.74894	0.4542
36	-3.1165	0.0016	1.0848	0.2842	-2.3105	0.0184
37	-0.60712	0.4232	-1.3597	0.1793	-2.071	0.06311
38	-2.2476	0.0255	1.5304	0.1289	-1.9366	0.05581
39	-2.51	0.0121	-1.0714	0.2947	-3.2023	0.0012
41	-1.8667	0.05361	2.0559	0.0353	0.40705	0.6829
42	-4.8514	< 2.2e-16	0.98974	0.2645	0.83079	0.4197
43	-1.4661	0.1415	-0.75147	0.4576	1.7304	0.1338
44	-3.064	0.0026	1.2872	0.1935	-1.9282	0.05051
45	-1.2216	0.2196	1.123	0.2686	-1.4388	0.1478
**：p<0.01	*:p<0.05
